# Supplementary material for: Effect of phenylacetic acid coligands on the structures and magnetic properties of azido-bridged copper(ii)-chain compounds
Source: Royal Society of Chemistry journal article supplement (doi:10.1039/c3ce42532k), 2014-01-01
Supplement: c3ce42532k1.pdf [file c3ce42532k1.pdf]

## Supporting Information

### Coligand phenylacetic acid effect on structure and magnetic property of azido-bridged copper(II)-chains compounds

Lan Yang,<sup>a</sup> Sheng Zhang,<sup>a</sup> Xiangyu Liu,<sup>a,b</sup> Qi Yang,<sup>a</sup> Qing Wei,<sup>a</sup> Gang Xie,<sup>a</sup> Sanping Chen\*<sup>a</sup>

<sup>a</sup> Key Laboratory of Synthetic and Natural Functional Molecule Chemistry of Ministry of Education, College of Chemistry and Materials Science, Northwest University, Xi'an, 710069, China

<sup>b</sup> School of Chemistry and Chemical Engineering, Ningxia University, Yinchuan 750021, China

**Corresponding author**

**Dr. Sanping Chen**

**Tel.: +8602988302604**

**Fax: +8602988302604**

**E-mail: [sanpingchen@126.com](mailto:sanpingchen@126.com); [sanpingchen312@gmail.com](mailto:sanpingchen312@gmail.com)**

**Table S1.** Selected bond lengths [Å] and angles [°] for compound **1**.

|                   |            |                     |            |
|-------------------|------------|---------------------|------------|
| O(2)-Cu(1)#1      | 1.942(2)   | O(2)#2-Cu(1)-N(1)#2 | 93.29(10)  |
| Cu(1)-O(1)        | 1.925(2)   | N(1)-Cu(1)-N(1)#2   | 175.42(2)  |
| Cu(1)-O(2)#2      | 1.942(2)   | O(1)-Cu(1)-O(5)     | 91.56(10)  |
| Cu(1)-O(5)        | 2.419(3)   | C(8)-O(2)-Cu(1)#1   | 129.3(2)   |
| Cu(1)-N(1)        | 2.003(2)   | O(2)#2-Cu(1)-O(5)   | 93.05(10)  |
| Cu(1)-N(1)#2      | 2.019(2)   | N(1)-Cu(1)-O(5)     | 85.26(11)  |
| N(1)-Cu(1)#1      | 2.019(2)   | N(1)#2-Cu(1)-O(5)   | 96.75(11)  |
| N(1)-N(2)         | 1.214(4)   | C(8)-O(1)-Cu(1)     | 134.5(2)   |
| N(2)-N(3)         | 1.133(4)   | N(2)-N(1)-Cu(1)     | 120.7(2)   |
| O(1)-Cu(1)-O(2)#2 | 175.30(10) | N(2)-N(1)-Cu(1)#1   | 116.2(2)   |
| O(1)-Cu(1)-O(2)#2 | 88.77(10)  | Cu(1)-N(1)-Cu(1)#1  | 110.40(12) |
| O(1)-Cu(1)-N(1)   | 90.70(10)  | N(3)-N(2)-N(1)      | 177.70(4)  |
| O(2)#2-Cu(1)-N(1) | 87.07(10)  |                     |            |

Symmetry transformations used to generate equivalent atoms:

#1 -x+1/2,y+1/2,-z+1/2    #2 -x+1/2,y-1/2,-z+1/2

**Table S2.** Selected bond lengths [Å] and angles [°] for compound **2**.

|                     |           |                     |           |
|---------------------|-----------|---------------------|-----------|
| Cu(1)-O(1)#1        | 1.917(10) | O(1)-Cu(1)-N(1)#1   | 88.5(5)   |
| Cu(1)-O(1)          | 1.917(10) | N(1)-Cu(1)-N(1)#1   | 180.0(1)  |
| Cu(1)-N(1)          | 1.917(11) | O(2)#2-Cu(2)-O(2)   | 180.0(2)  |
| Cu(1)-N(1)#1        | 1.917(11) | O(2)#2-Cu(2)-N(1)   | 88.7(4)   |
| Cu(2)-O(2)#2        | 1.934(10) | O(2)-Cu(2)-N(1)     | 91.3(4)   |
| Cu(2)-O(2)          | 1.934(10) | O(2)#2-Cu(2)-N(1)#2 | 91.3(4)   |
| Cu(2)-N(1)          | 1.993(11) | O(2)-Cu(2)-N(1)#2   | 88.7(4)   |
| Cu(2)-N(1)#2        | 1.993(11) | N(1)-Cu(2)-N(1)#2   | 180.0(1)  |
| N(1)-N(2)           | 1.189(16) | C(1)-O(1)-Cu(1)     | 134.6(10) |
| N(2)-N(3)           | 1.160(18) | C(1)-O(2)-Cu(2)     | 135.3(9)  |
| O(1)#1-Cu(1)-O(1)   | 180.0(2)  | N(2)-N(1)-Cu(1)     | 121.3(10) |
| O(1)#1-Cu(1)-N(1)   | 88.5(5)   | N(2)-N(1)-Cu(2)     | 117.7(9)  |
| O(1)-Cu(1)-N(1)     | 91.5(5)   | Cu(1)-N(1)-Cu(2)    | 120.4(6)  |
| O(1)#1-Cu(1)-N(1)#1 | 91.5(5)   | N(3)-N(2)-N(1)      | 178.0(2)  |

Symmetry transformations used to generate equivalent atoms:

#1 -x+1,-y+2,-z+1    #2 -x,-y+2,-z+1

**Table S3.** Selected bond lengths [Å] and angles [°] for compound **3**.

|               |          |                      |           |
|---------------|----------|----------------------|-----------|
| Cu(1)-O(12)#1 | 1.926(4) | O(1)-Cu(1)-N(3)      | 94.0(2)   |
| Cu(1)-O(1)    | 1.960(4) | O(12)#1-Cu(1)-N(3)#1 | 93.0(2)   |
| Cu(1)-N(3)    | 1.973(5) | O(1)-Cu(1)-N(3)#1    | 90.1(2)   |
| Cu(1)-N(3)#1  | 1.979(5) | N(3)-Cu(1)-N(3)#1    | 152.29(9) |
| N(3)-Cu(1)#2  | 1.979(5) | N(2)-N(1)-N(3)       | 178.7(7)  |
| O(12)-Cu(1)#2 | 1.926(4) | N(1)-N(3)-Cu(1)      | 118.0(4)  |
| N(1)-N(2)     | 1.125(7) | N(1)-N(3)-Cu(1)#2    | 118.7(4)  |
| N(1)-N(3)     | 1.225(8) | Cu(1)-N(3)-Cu(1)#2   | 122.4(3)  |

|                    |            |                    |          |
|--------------------|------------|--------------------|----------|
| O(12)#1-Cu(1)-O(1) | 164.77(19) | C(9)-O(1)-Cu(1)    | 129.6(4) |
| O(12)#1-Cu(1)-N(3) | 90.1(2)    | C(9)-O(12)-Cu(1)#2 | 127.6(4) |

Symmetry transformations used to generate equivalent atoms:  
#1 -x+2,y-1/2,-z+3/2    #2 -x+2,y+1/2,-z+3/2

**Table S4.** Structural and magnetic parameters for Cu(II)-azido mixed-bridged compounds.

| Year | Unit  | Formula                                                                                                                       | Dimension | Cu-N-Cu(°)             | Cu...Cu(Å)<br>(intrachain) | $\chi_M T$ (300 K)<br>(cm <sup>3</sup> mol <sup>-1</sup> K) | $J^a$ (cm <sup>-1</sup> )    | Ref. |
|------|-------|-------------------------------------------------------------------------------------------------------------------------------|-----------|------------------------|----------------------------|-------------------------------------------------------------|------------------------------|------|
| 1997 | 2Cu   | [Cu <sub>2</sub> (N <sub>3</sub> ) <sub>2</sub> (NO <sub>3</sub> ) <sub>2</sub> (L <sup>1</sup> ) <sub>2</sub> ] <sub>n</sub> | 1D        | 119.5                  | 3.44                       | 0.62                                                        | 26                           | 17   |
|      | 1Cu   | {[Cu(Hpht)(N <sub>3</sub> )]H <sub>2</sub> O} <sub>n</sub>                                                                    | 1D        | 111.9                  | 3.28                       | 0.60                                                        | 75                           | 16   |
| 2006 | 1Cu   | [Cu(INO)(N <sub>3</sub> )(H <sub>2</sub> O) <sub>0.5</sub> ] <sub>n</sub>                                                     | 3D        | 106.6                  | 3.22                       | 0.64                                                        | 80                           | 10c  |
|      | 1Cu   | [Cu(NNO)(N <sub>3</sub> )(H <sub>2</sub> O) <sub>0.5</sub> ] <sub>n</sub>                                                     | 2D        | 124.3                  | 3.52                       | 0.57                                                        | 48                           | 10c  |
|      | 1.5Cu | [Cu <sub>1.5</sub> (N <sub>3</sub> ) <sub>2</sub> (isonic)] <sub>n</sub>                                                      | 3D        | 106.7                  | 3.20                       | 1.40                                                        | 80                           | 21a  |
| 2007 | 3Cu   | [Cu <sub>3</sub> (R)-phea) <sub>2</sub> (N <sub>3</sub> ) <sub>6</sub> ] <sub>n</sub>                                         | 2D        | 101.8                  | 3.04                       | 1.27                                                        | 15.27                        | 21b  |
|      | 3Cu   | [Cu <sub>3</sub> (S)-phea) <sub>2</sub> (N <sub>3</sub> ) <sub>6</sub> ] <sub>n</sub>                                         |           |                        |                            |                                                             |                              |      |
|      | 1Cu   | [Cu(N <sub>3</sub> )(nic)] <sub>n</sub>                                                                                       | 3D        | 113.6                  | 3.35                       | 0.54                                                        | 39.1                         | 21c  |
|      | 1.5Cu | [Cu <sub>1.5</sub> (hnta)(N <sub>3</sub> ) <sub>2</sub> (H <sub>2</sub> O)] <sub>n</sub>                                      | 1D        | 103.2                  | 3.12                       | 0.80                                                        | 89                           | 15a  |
|      | 3Cu   | [Cu <sub>3</sub> (hnta) <sub>4</sub> (N <sub>3</sub> ) <sub>2</sub> (H <sub>2</sub> O) <sub>3</sub> ] <sub>n</sub>            | 0D        | 116.2                  | 3.39                       | 1.60                                                        | 69.7                         | 15a  |
| 2008 | 1Cu   | [Cu(N <sub>3</sub> )(tp)(CH <sub>3</sub> OH)] <sub>n</sub>                                                                    | 2D        | 105.5                  | 3.19                       | 0.54                                                        | 63                           | 21d  |
| 2009 | 2Cu   | [Cu <sub>2</sub> (4-pya) <sub>2</sub> (N <sub>3</sub> ) <sub>2</sub> (DMF)] <sub>n</sub>                                      | 2D        | 102.1                  | -                          | 0.98                                                        | 145                          | 10b  |
|      | 1Cu   | [Cu(benzoate)(N <sub>3</sub> )] <sub>n</sub>                                                                                  | 1D        | 126.8                  | 3.54                       | 0.56                                                        | 33.90                        | 11a  |
|      | 1Cu   | [Cu(L <sup>2</sup> )(N <sub>3</sub> )] <sub>n</sub>                                                                           | 2D        | 108.2                  | 3.23                       | 0.59                                                        | 93.10                        | 11a  |
|      | 1Cu   | [Cu(1-naphthoate)(N <sub>3</sub> )] <sub>n</sub>                                                                              | 2D        | 116.8                  | 3.41                       | 0.61                                                        | 65.63                        | 11a  |
|      | 1Cu   | [Cu(N <sub>3</sub> )(p-CPA)] <sub>n</sub>                                                                                     | 2D        | 107.0                  | 3.18                       | 0.52                                                        | 68.82                        | 22a  |
| 2010 | 1Cu   | [Cu(2-Clnic)(N <sub>3</sub> )(CH <sub>3</sub> OH)] <sub>n</sub>                                                               | 1D        | 110.3                  | 3.29                       | -                                                           | 81.22                        | 22b  |
|      | 3Cu   | [Cu <sub>3</sub> (pyz) <sub>2</sub> (N <sub>3</sub> ) <sub>6</sub> ] <sub>n</sub>                                             | 2D        | 100.5                  | 3.09                       | 1.39                                                        | 118.8                        | 22c  |
| 2011 | 1Cu   | [Cu(mptz)(N <sub>3</sub> ) <sub>2</sub> ] <sub>n</sub>                                                                        | 1D        | 103.3                  | 3.15                       | 0.48                                                        | 65.4                         | 22d  |
|      | 1Cu   | [Cu(4,3-pybz)(N <sub>3</sub> )] <sub>n</sub>                                                                                  | 2D        | 109.4                  | 3.25                       | 0.52                                                        | 63.9                         | 11c  |
|      | 2Cu   | [Cu <sub>2</sub> (4,4-pybz) <sub>3</sub> (N <sub>3</sub> )] <sub>n</sub> • 3nH <sub>2</sub> O                                 | 3D        | 101.1                  | 3.08                       | 0.91                                                        | 93.6                         | 11c  |
| 2012 | 4Cu   | [Cu <sub>4</sub> (N <sub>3</sub> ) <sub>8</sub> (Me-hmpz) <sub>2</sub> ] <sub>n</sub>                                         | 1D        | 101.0                  | 3.11                       | 1.66                                                        | $J_1=40.57$<br>$J_2=28.47$   | 22e  |
|      | 4Cu   | [Cu <sub>4</sub> (N <sub>3</sub> ) <sub>8</sub> (men) <sub>2</sub> ] <sub>n</sub>                                             | 1D        | 102.2                  | 3.40                       | 1.75                                                        | $J_1=57.97$<br>$J_2=-14.03$  | 22e  |
|      | 5Cu   | [Cu <sub>5</sub> (N <sub>3</sub> ) <sub>10</sub> (N,N'-dmen) <sub>2</sub> ] <sub>n</sub>                                      | 2D        | 101.6                  | 3.40                       | 1.68                                                        | $J_1=-494.99$<br>$J_2=88.60$ | 22e  |
|      | 5Cu   | [Cu <sub>5</sub> (N <sub>3</sub> ) <sub>10</sub> (N,N'-dmen) <sub>5</sub> ] <sub>n</sub>                                      | 1D        | 102.2                  | 3.50                       | 1.67                                                        | -                            | 22e  |
| 2013 | 4Cu   | [Cu <sub>4</sub> (N <sub>3</sub> ) <sub>8</sub> (L <sup>3</sup> ) <sub>2</sub> ] <sub>n</sub>                                 | 1D        | 102.9<br>137.1         | 3.12<br>4.13               | 1.65                                                        | $J_1=-0.70$<br>$J_2=64.9$    | 22f  |
|      | 4Cu   | [Cu <sub>4</sub> (N <sub>3</sub> ) <sub>6</sub> (L <sup>4</sup> ) <sub>2</sub> (H <sub>2</sub> O) <sub>2</sub> ] <sub>n</sub> | 2D        | 93.4<br>102.1<br>108.9 | 3.10<br>3.22               | 1.60                                                        | $J_1=-81.0$<br>$J_2=112.4$   | 22f  |
|      | 4Cu   | [Cu <sub>4</sub> (N <sub>3</sub> ) <sub>6</sub> (L <sup>5</sup> ) <sub>2</sub> ] <sub>n</sub>                                 | 1D        | 91.8<br>102.2          | 3.18<br>3.09               | 1.59                                                        | $J_1=-77.9$<br>$J_2=129.9$   | 22f  |

|          |     |                                                               |    |       |      |      |       |           |
|----------|-----|---------------------------------------------------------------|----|-------|------|------|-------|-----------|
|          |     |                                                               |    | 107.3 | 3.18 |      |       |           |
| Our work | 1Cu | $[\text{Cu}(o\text{-npa})(\text{N}_3)(\text{H}_2\text{O})]_n$ | 1D | 110.3 | 3.30 | 0.55 | 35.44 | this work |
|          | 1Cu | $[\text{Cu}(p\text{-npa})(\text{N}_3)]_n$                     | 2D | 120.4 | 3.39 | 0.40 | 52.25 | this work |
|          | 1Cu | $[\text{Cu}(p\text{-mpa})(\text{N}_3)]_n$                     | 2D | 122.4 | 3.46 | 0.53 | -     | this work |

$J'$ : intrachain coupling.

$L^1 = \text{Me}_3\text{NCH}_2\text{CO}_2$ , Hpht = hydrogen phthalate, INO = isonicotinate *N*-oxide, NNO = nicotinate *N*-oxide, isonic = isonicotinate, phea = 1-phenylethylamine, nic = nicotinate, hnta = 6-hydroxynicotinate, tp = terephthalate, 4-Hpva = 4-pyridylacrylic acid,  $L^2 = 2\text{-methyl-benzoate}$ , *p*-CPAH = *p*-cyanophenoxyacetic acid, 2-Clnic = 2-chloronicotinate, pyz = pyrazine, mptz = *N*-methyl-4-pyridinium tetrazolate, 4,3-pybz = 4-(3-pyridyl)benzoate, 4,4-pybz = 4-(4-pyridyl)benzoate, Me-hmpz = 1-methylhomopiperazine, men = *N*-methylethylenediamine, *N,N*-dmen = *N,N*-dimethylethylenediamine, *N,N'*-dmen = *N,N'*-dimethylethylenediamine,  $L^3$  is the imine resulting from the condensation of pyridine-2-carboxaldehyde with *N*-methylethylenediamine,  $\text{HL}^4$  and  $\text{HL}^5$  are the condensation products of 2-hydroxy-3-methoxybenzaldehyde with *N,N*-diethylethylenediamine and *N*-ethylethylenediamine respectively, *o*-Hnpa = *o*-nitrophenylacetic acid, *p*-Hnpa = *p*-nitrophenylacetic acid, and *p*-Hmpa = *p*-methylphenylacetic acid.

All of the  $J$  values were quoted using the Hamiltonian  $H = -J \sum S_i \cdot S_{i+1}$ .

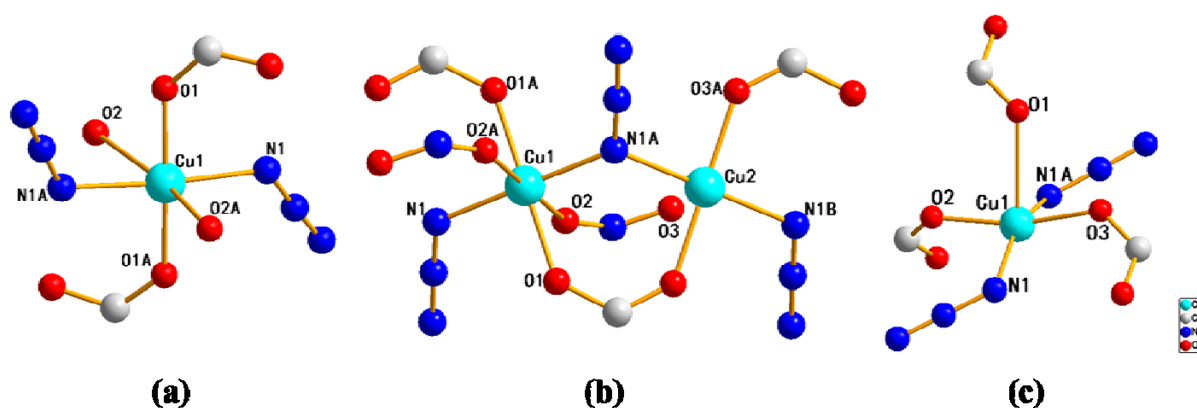

**Fig. S1** The coordination environments of Cu(II) ions in **1(a)**, **2(b)** and **3(c)** respectively. H atoms and benzene rings have been omitted for clarity.

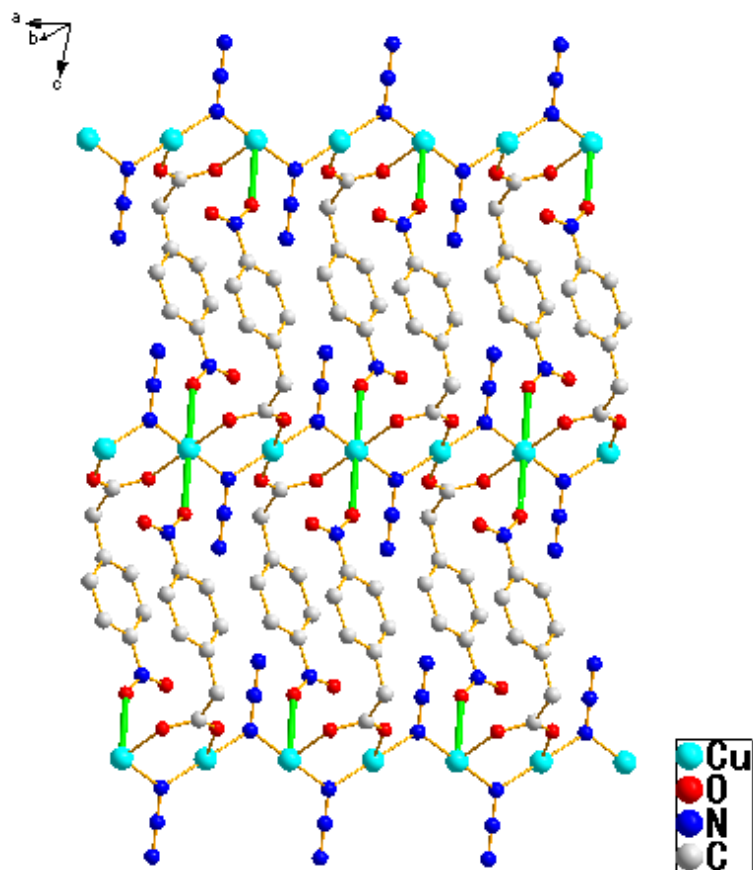

**Fig. S2** Two adjacent 1D chains are cross-linked by the coordinated nitro groups from the *p*-npa ligands forming the 2D structure of compound 2. H atoms have been omitted for clarity.

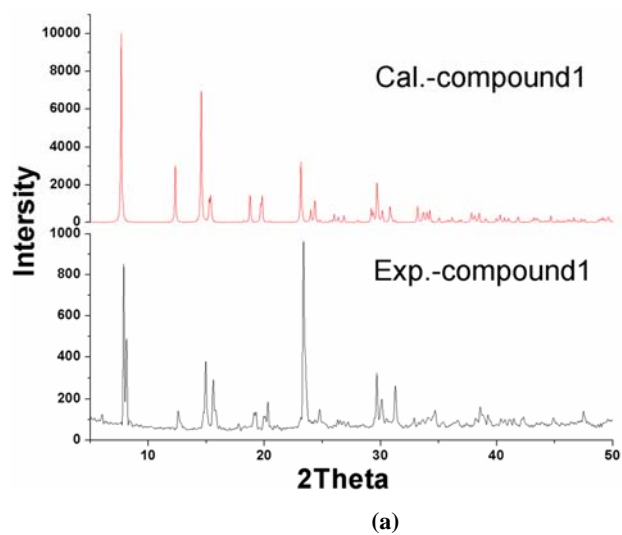

(a)

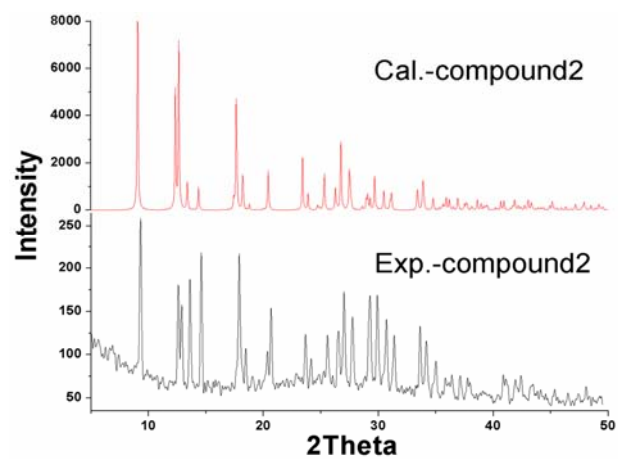

(b)

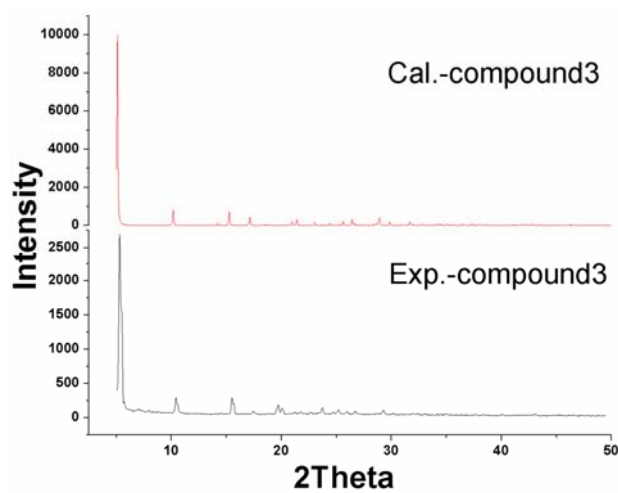

(c)

Fig. S3 The XRPD diagrams for compounds: (a) 1, (b) 2, and (c) 3.

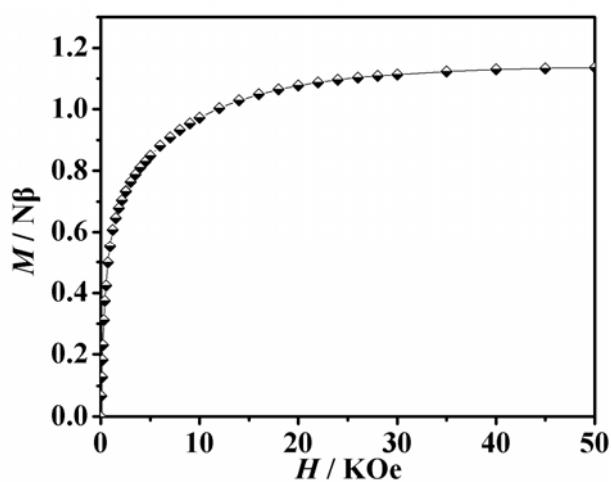

Fig. S4 Magnetization vs H plot for compound 1.

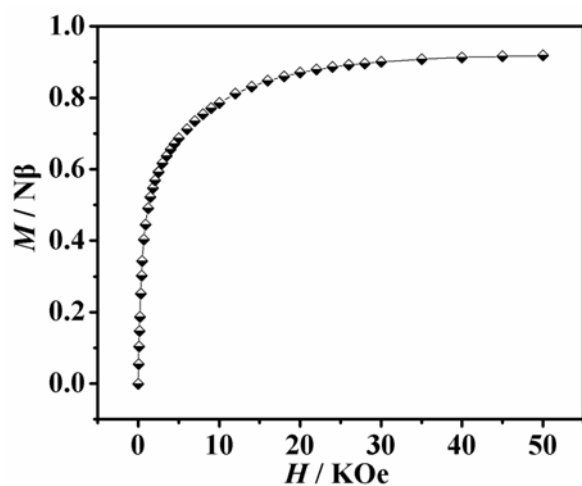

Fig. S5 Magnetization vs H plot for compound 2.

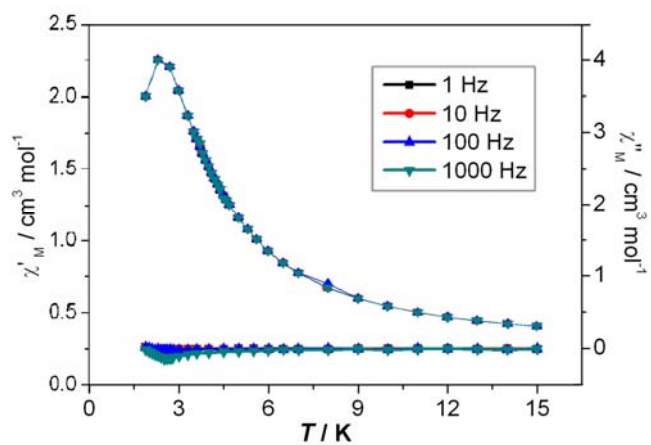

Fig. S6  $\chi'_M$  and  $\chi''_M$  vs  $T$  plots for compound 2.

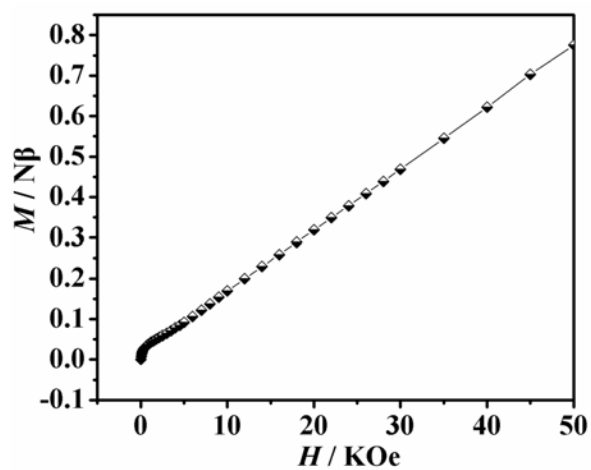

Fig. S7 Magnetization vs H plot for compound 3.
